## CORRESPONDENCE

Anesthesiology  
59:362, 1983

### Duchenne's Muscular Dystrophy and Malignant Hyperthermia: Another Warning

*To the Editor:*—Duchenne's muscular dystrophy (DMD) is an x-linked disorder associated with skeletal muscle destruction and cardiac muscle dysfunction. After a progressive period of increasing disability, death usually occurs in the second decade of life. Sudden cardiac arrest in the recovery room and acute exacerbation of the muscle destruction have been reported following anesthesia and surgery.<sup>1,2</sup> A few cases of malignant hyperthermia (MH) have been diagnosed in patients with DMD based on clinical criteria.<sup>3,4</sup> Recently Kelfer *et al.*<sup>5</sup> described a patient with DMD who, after a benign halothane anesthetic, suffered a cardiac arrest in the recovery room. Muscle biopsy investigation, using the technique of calcium uptake into isolated sarcoplasmic reticulum showed that the patient was also susceptible to developing MH.

Brownell *et al.* also recently have reported masseter spasm and ventricular fibrillation in a patient with DMD following succinylcholine.<sup>6</sup> The caffeine contracture test on the biopsied vastus lateralis muscle showed a response indicating MH susceptibility.

We recently have performed biopsies the vastus lateralis muscle of a 4-year-old boy with muscle weakness and histologic evidence consistent with DMD. There was no family history of MH. Femoral nerve block with 1% carbocaine and sedation with diazepam was used to provide anesthesia. We found that the muscle, when tested for the response to halothane responded with 0.75 g contracture to 2% halothane; consistent with susceptibility to MH.<sup>7,8</sup> The response to caffeine was normal, however, we have observed that in approximately 50% of biopsy specimens from MH positives, the response to caffeine is normal, although a response diagnostic of MH is observed with halothane alone.<sup>8</sup>

Malignant hyperthermia susceptibility has been associated with several specific muscle disorders such as central core disease and King Denborough syndrome, as well as nonspecific myopathies.<sup>9</sup> It now seems appropriate to state that patients with DMD are at greater risk for MH compared with the general population. Although not all DMD patients are at risk for MH and

certainly not all MH patients are likely to have DMD, nevertheless, precautions appropriate for MH should be considered for DMD patients about to undergo anesthesia.

HENRY ROSENBERG, M.D.  
*Professor and Chairman*  
*Department of Anesthesiology*

TERRY HEIMAN-PATTERSON, M.D.  
*Assistant Professor of Neurology*  
*Department of Anesthesiology*  
*Hahnemann Medical College and Hospital*  
*230 North Broad Street*  
*Philadelphia, Pennsylvania 19102*

#### REFERENCES

1. Boba A: Fatal post-anesthetic complication in two muscular dystrophy patients. *J Pediatr Surg* 5:71-73, 1970
2. Miller ED, Sanders DB, Rowlingson JC, Berry FA, Sussman MD, Epstein RM: Anesthesia-induced rhabdomyolysis in a patient with Duchenne's muscular dystrophy. *ANESTHESIOLOGY* 48:146-148, 1978
3. Seay AR, Fiter FA, Thompson JA: Cardiac arrest during induction of anesthesia in Duchenne muscular dystrophy. *J Pediatr* 93:88-89, 1978
4. Linter SPK, Thomas PR, Withington PS, Hall MG: Suxamethonium associated hypertonicity and cardiac arrest in unsuspected pseudohypertrophic muscular dystrophy. *Br J Anaesth* 4:1331-1332, 1982
5. Kelfer HM, Singer WD, Reynolds RN: Malignant hyperthermia in a child with Duchenne muscular dystrophy. *Pediatrics* 71:118-119, 1983
6. Brownell AKW, Paasuke RT, Elash A, Fowlow SB, Seagram CGF, Diewold RJ, Friesen C: Malignant hyperthermia in Duchenne muscular dystrophy. *ANESTHESIOLOGY* 58:180-182, 1983
7. Rosenberg H, Fischer C, Reed SB, Addonizio VP: Platelet aggregation in patients susceptible to malignant hyperpyrexia. *ANESTHESIOLOGY* 55:621-624, 1981
8. Rosenberg H, Reed SB: In vitro contracture tests for susceptibility to malignant hyperthermia. *Anesth Analg* 62:415-420, 1983
9. Gronert GA: Malignant hyperthermia. *ANESTHESIOLOGY* 53:395-423, 1980

(Accepted for publication February 17, 1983.)

Anesthesiology  
59:362-363, 1983

### Preoperative Nifedipin Treatment and Anesthesia in Patients with Coronary Heart Disease

*To the Editor:*—In their outstanding review, Reves *et al.*<sup>1</sup> stressed the increasing importance of calcium channel blockers and called our attention to the problems

that may occur when patients maintained on these drugs require general anesthesia.

In order to obtain more insight into the interaction

TABLE 1. Hemodynamic Response to Anesthesia and Surgery

| Preoperative treatment   | N  | Before Induction |          |        |             | Intubation |         |        |             |
|--------------------------|----|------------------|----------|--------|-------------|------------|---------|--------|-------------|
|                          |    | HR               | MAP      | PCWP   | CI          | HR         | MAP     | PCWP   | CI          |
| Nifedipin                | 13 | 67 ± 11          | 87 ± 15  | 8 ± 3  | 2.83 ± 0.54 | 77 ± 16    | 96 ± 20 | 9 ± 4  | 2.61 ± 0.75 |
| Beta-blocker             | 14 | 59 ± 10          | 87 ± 14  | 10 ± 4 | 2.82 ± 0.72 | 82 ± 16    | 98 ± 22 | 11 ± 4 | 2.87 ± 1.0  |
| Nifedipin + beta-blocker | 35 | 61 ± 11          | 81 ± 12  | 9 ± 4  | 2.65 ± 0.43 | 76 ± 12    | 95 ± 18 | 11 ± 5 | 2.72 ± 0.6  |
|                          | N  | Anesthesia       |          |        |             | Sternotomy |         |        |             |
|                          |    | HR               | MAP      | PCWP   | CI          | HR         | MAP     | PCWP   | CI          |
| Nifedipin                | 13 | 70 ± 15          | 79† ± 13 | 11 ± 4 | 2.38 ± 0.47 | 62 ± 12    | 92 ± 14 | 13 ± 4 | 2.10 ± 0.42 |
| Beta-blocker             | 16 | 65 ± 12          | 87 ± 10  | 11 ± 4 | 2.45 ± 0.53 | 55 ± 11    | 99 ± 10 | 12 ± 4 | 2.14 ± 0.48 |
| Nifedipin + beta-blocker | 35 | 63 ± 10          | 80† ± 9  | 10 ± 4 | 2.16 ± 0.43 | 60 ± 10    | 90 ± 15 | 11 ± 3 | 2.12 ± 0.6  |

HR = heart rate (beats/min); MAP = mean arterial pressure (mmHg); PCWP = pulmonary capillary wedged pressure (mmHg); CI

= cardiac index ( $l \cdot \text{min}^{-1} \cdot \text{m}^{-2}$ ). Values are means ± standard deviation, † = significantly different from the beta-blocker group ( $p < 0.05$ ).

between preoperative long-term calcium channel blockade and anesthesia and intraoperative stress, we analysed retrospectively, 70 consecutive patients (age  $56 \pm 8$ ) with coronary heart disease and angina pectoris, scheduled for aortocoronary bypass surgery. Sixty-four per cent of the patients had three-vessel disease, 66% were in functional class 3-4, and the preoperative LVEDP was  $20 \pm 6$  mmHg. Preoperatively 13 patients were taking nifedipin, 16 were taking beta-blockers, and 35 were taking both nifedipin and beta-blockers. Two patients were being maintained on verapamil, and four were on long-acting nitrates only. The average nifedipin dose was  $44 \pm 20$  mg daily, and the last dose was given orally 1 h before anesthesia. All other medication was continued up to the night before surgery. For anesthesia, flunitrazepam, fentanyl, pancuronium, and nitrous oxide were used and nitroglycerin added iv when required.

Table 1 shows the hemodynamic data prior to, and 10 min after, induction and the peak response to in-

tubation and sternotomy in the patients on nifedipin and beta-blockers.

Except for lower arterial pressure under anesthesia in the nifedipin groups, the analysis of variance did not reveal any significant differences between the groups. Up to now we have not seen any adverse effects that could be attributed to preoperative nifedipin treatment.

DR. KARL SKARVAN, FMH  
Department of Anesthesia,  
University of Basel  
Kantonsspital Basel  
4031 Basel  
Switzerland

REFERENCES

1. Reves JG, Kissin I, Lell WA, Tosone S: Calcium entry blockers: Uses and implications for anesthesiologists. ANESTHESIOLOGY 57:504-518, 1982

(Accepted for publication March 8, 1983.)

Methadone Titration to Avoid Excessive Respiratory Depression

To the Editor:—It is unfortunate that for the past several decades the excellent clinical properties of methadone largely have been ignored by American anesthesiologists. In this regard, Gourlay *et al.*<sup>1</sup> are to be commended for their excellent article in which they comprehensively ascertained the pharmacokinetics and pharmacodynamics of this narcotic in the perioperative period. They were able to produce satisfactory analgesia

with 20 mg of methadone given upon induction with the analgesic effect lasting well into the postoperative period.

It is the potential for prolonged respiratory depression, however, that deters most anesthesiologists from using this narcotic. While this problem does exist, we believe that the risk has been overstated: in particular, we have found that titrating the drug before induction
